# Supplementary material
Source: PubMed Central journal article supplement (PMC6662236)

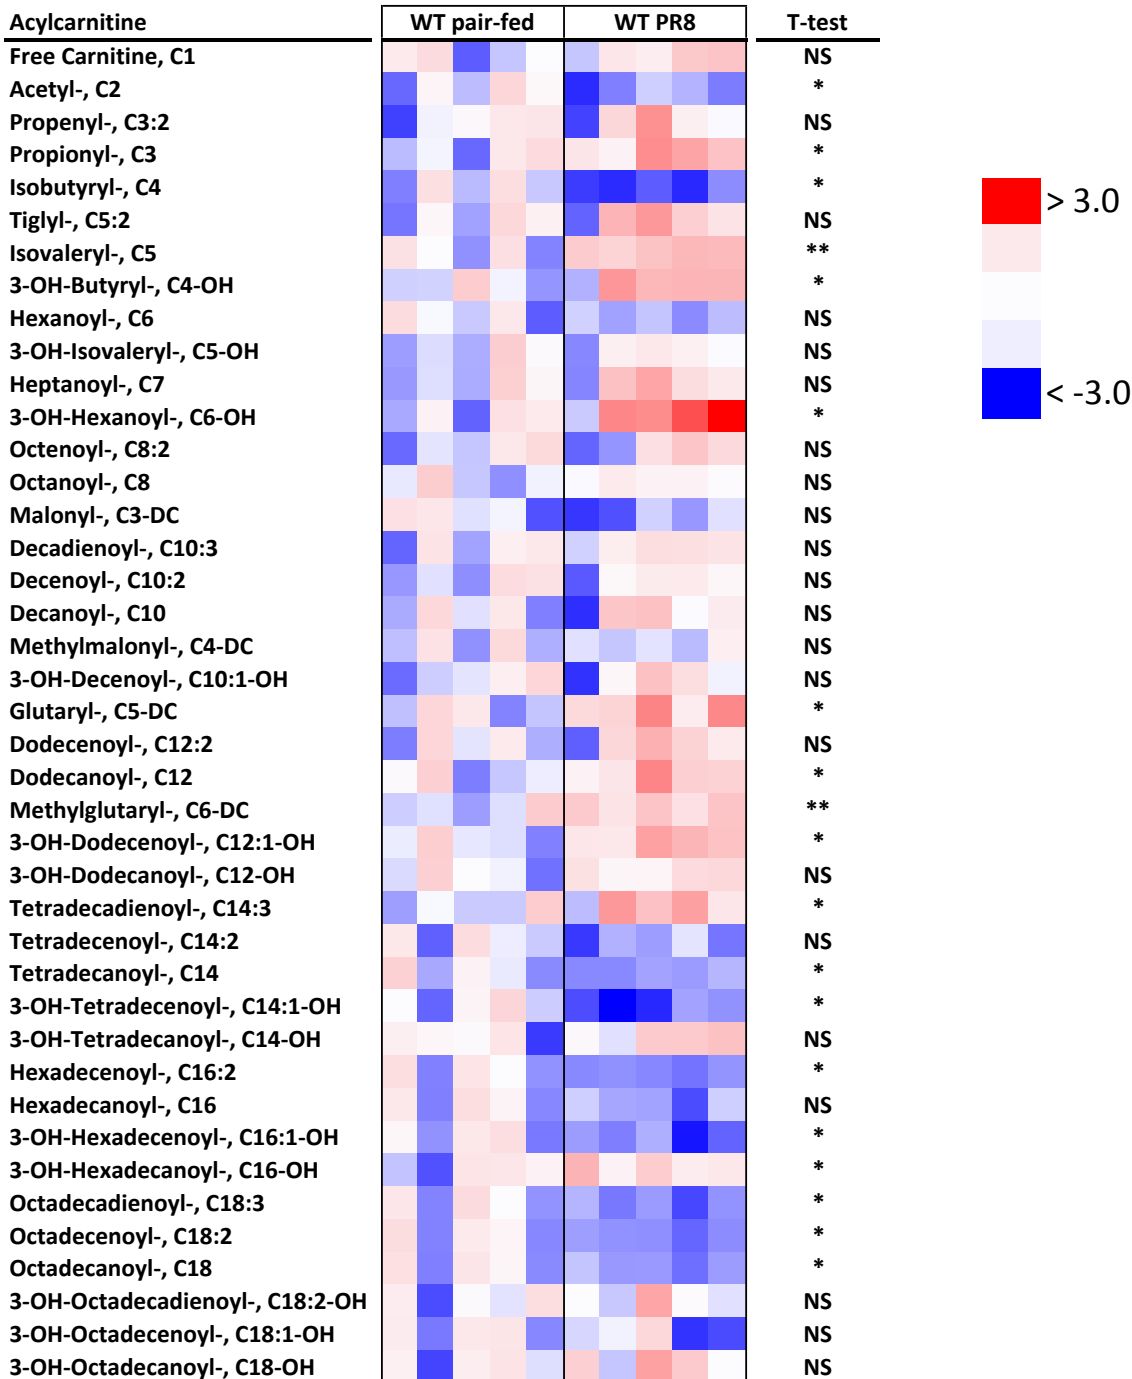

Supplement: NIHMS986250-supplement-Table_S3.pdf [file NIHMS986250-supplement-Table_S3.pdf]
